# Supplementary material
Source: PubMed Central journal article supplement (PMC5581406)
Supplement: NIHMS810420-supplement-Supp_Data.pdf [file NIHMS810420-supplement-Supp_Data.pdf]

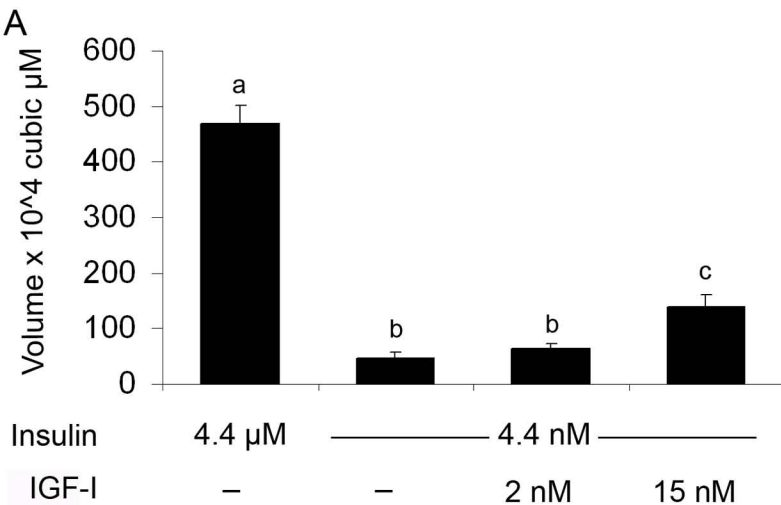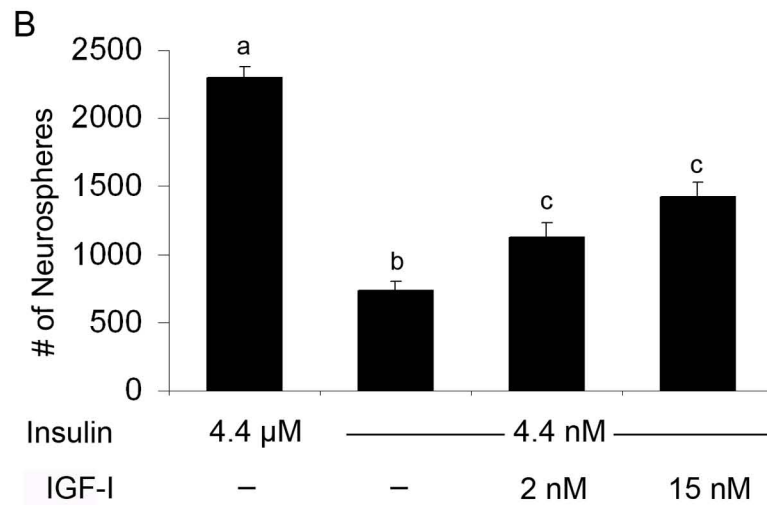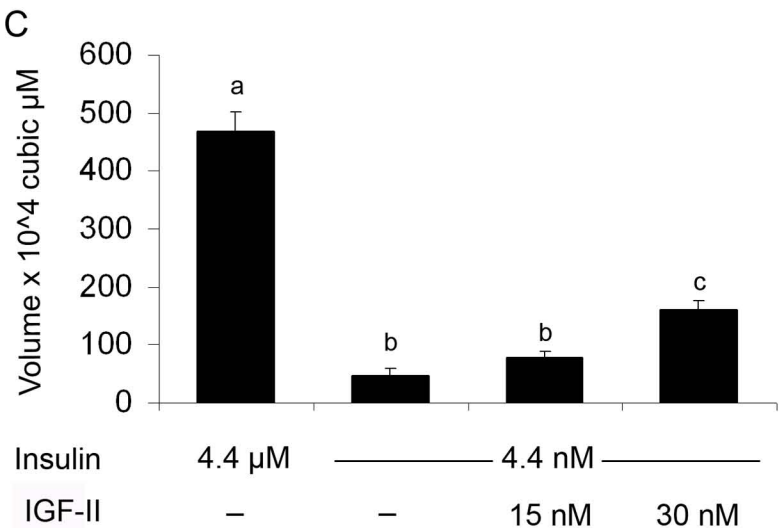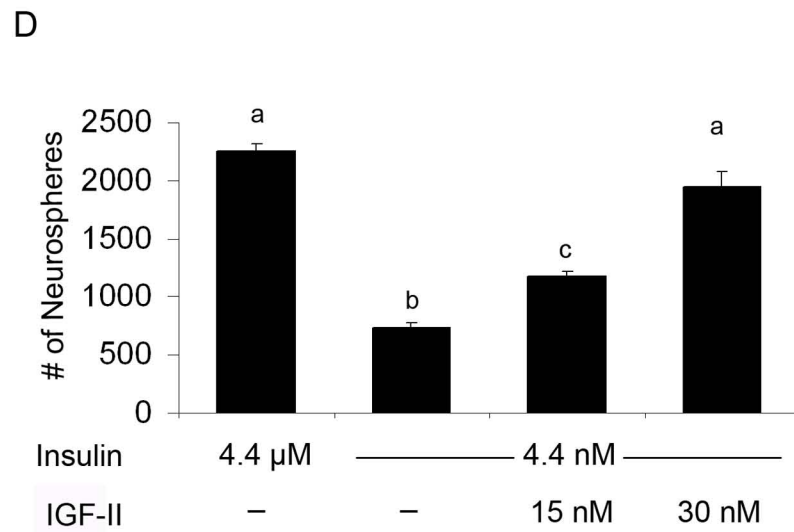

Supplemental table 1. Stem Cell Gene Expression

| Media        |   |                   |                   |                 |                 |       |
|--------------|---|-------------------|-------------------|-----------------|-----------------|-------|
| IGF-I        |   | -                 | -                 | -               | 15 nM           | 15 nM |
| IGF-II       |   | -                 | -                 | 30 nM           | -               | 30 nM |
| Insulin      |   | 4.4 $\mu$ M       |                   | 4.4 nM          |                 |       |
| Gene         |   |                   |                   |                 |                 |       |
| <i>ABCg</i>  | 1 | 1.04 $\pm$ 0.06   | 1.74 $\pm$ 0.12 * | 1.35 $\pm$ 0.42 | 0.94 $\pm$ 0.12 |       |
| <i>FABP7</i> | 1 | 4.63 $\pm$ 2.09   | 4.04 $\pm$ 0.70 * | 2.39 $\pm$ 0.98 | 2.25 $\pm$ 0.54 |       |
| <i>Sox1</i>  | 1 | 1.58 $\pm$ 0.07 * | 2.74 $\pm$ 0.25 * | 1.37 $\pm$ 0.53 | 2.13 $\pm$ 0.38 |       |

\* Significance vs. 4.4  $\mu$ M Insulin
